# Supplementary figures and images for: Paradoxic effects of metformin on endothelial cells and angiogenesis
Source: PubMed Central journal article supplement — Carcinogenesis. 2014 Jan 13;35(5):1055–66. doi: 10.1093/carcin/bgu001 (PMC4004203; doi:10.1093/carcin/bgu001), 2014-01-13

## Supplementary Fig. 1

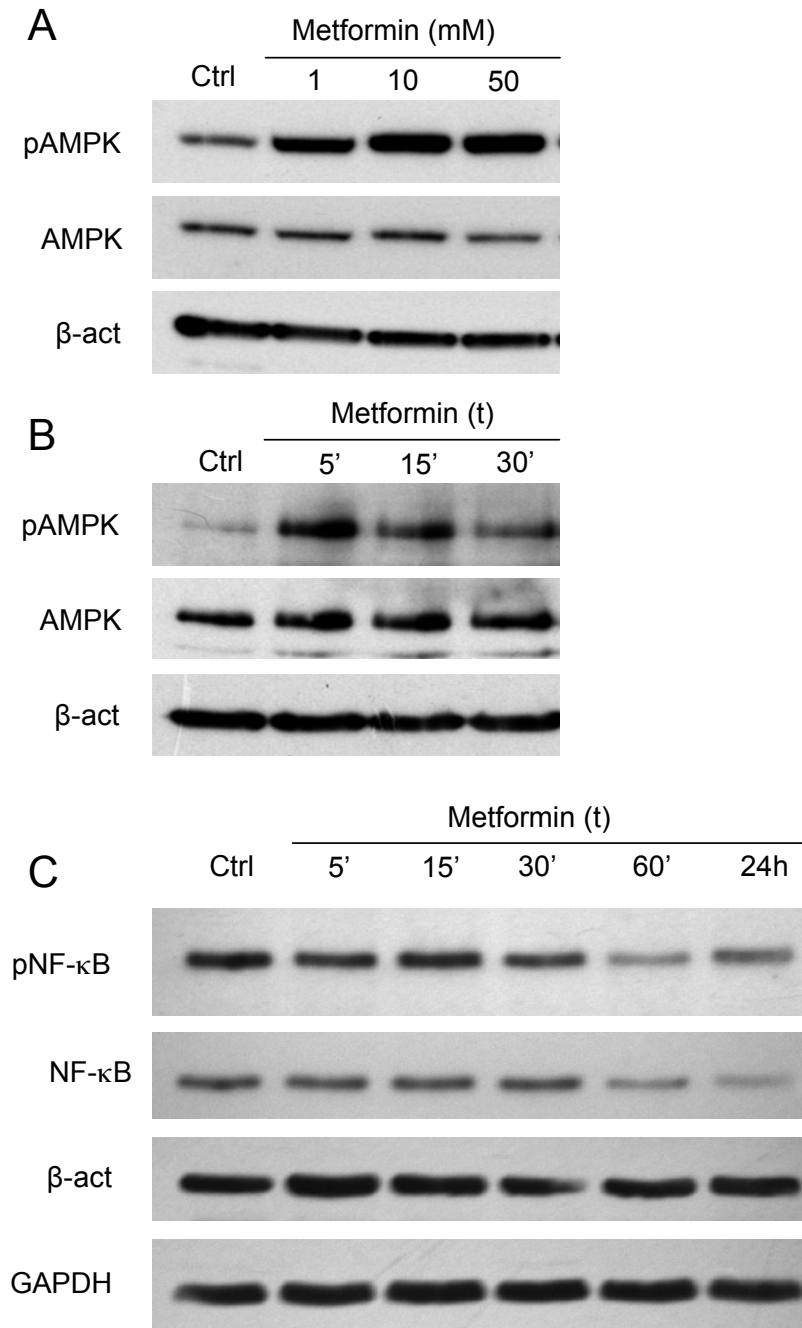

Supplementary Fig. 2

A

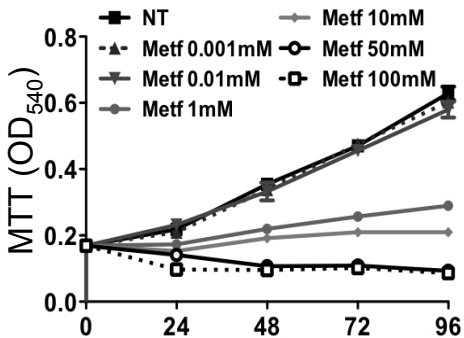

B

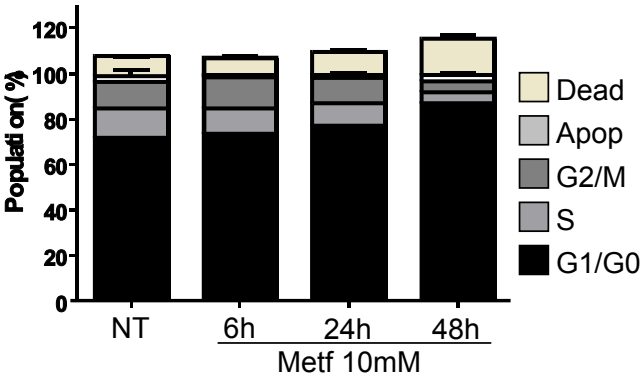

C

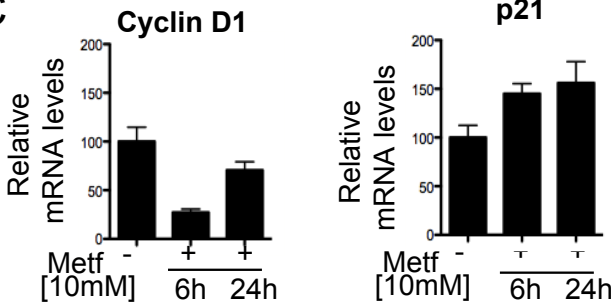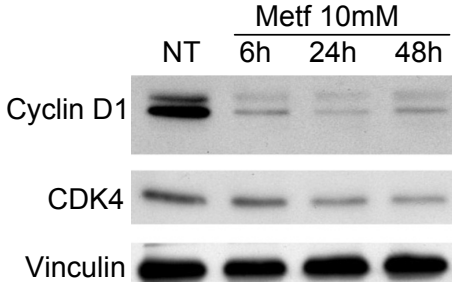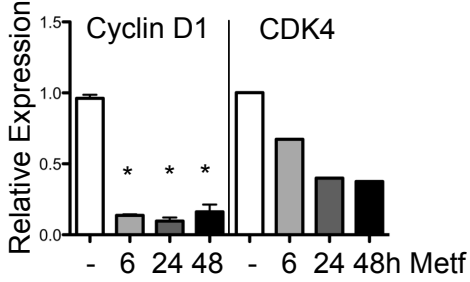

D

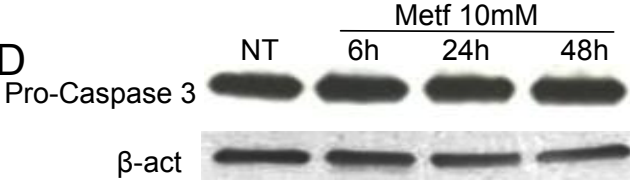

E

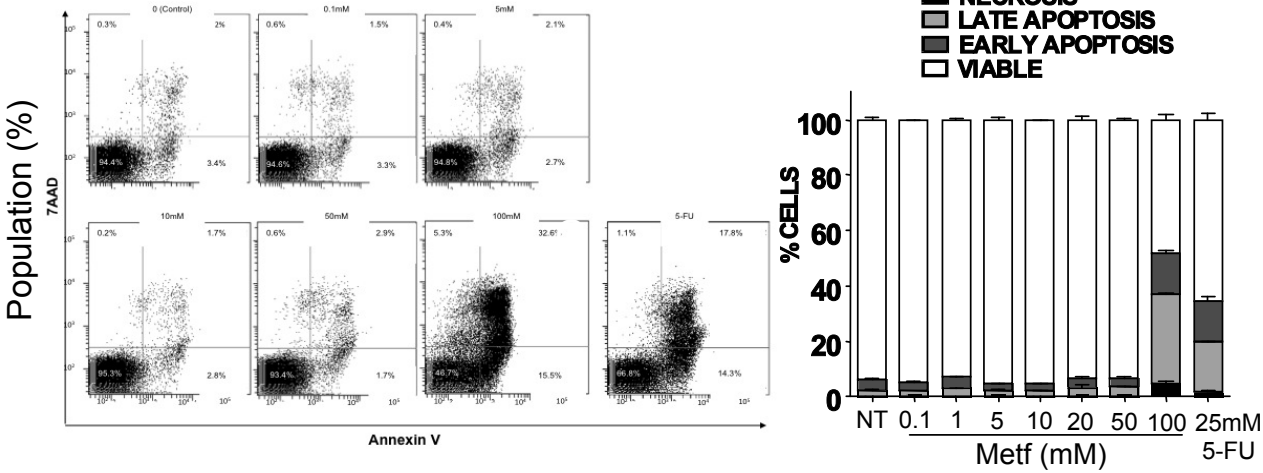

Supplementary Fig. 3

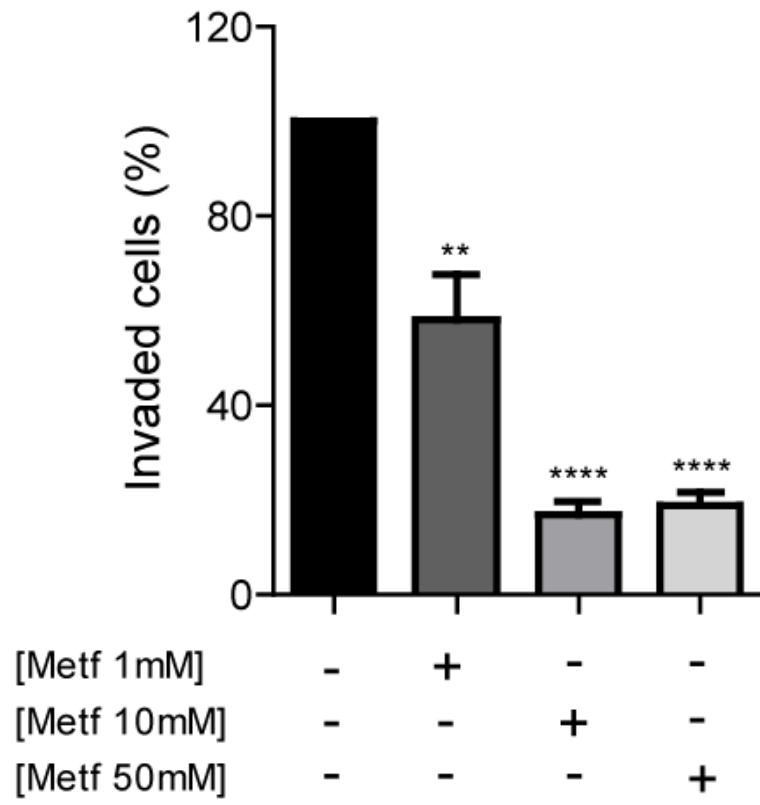

# Supplementary Fig. 4

E

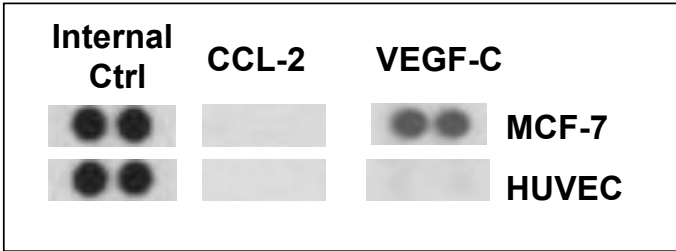

Supplement: supp_bgu001_Suppl_Fig_bgu001.pdf [file supp_bgu001_Suppl_Fig_bgu001.pdf]
